# Supplementary material
Source: publisher figshare collection journal article supplement (https://gsajournals.figshare.com/ndownloader/files/13430786)
Supplement: Supplementary file 1 [file 13430786]

## Sheet: Sheet1
Supplementary Table 1. Primers used in this work.
Usage	Primer name	Forward primer
Mapping	umc2627-F	TGAGCCCTACATGAAGCAATCATA
	umc2627-R	TTTATCAGTGCACCATCCTCAATG
	bnlg1909-F	CCTGACCCTGTTCCTGAAAA
	bnlg1909-R	GTGTGTCTGGAGCTGTTCGA
	umc1485-F	CAATACCATTACATACCCGCACAA
	umc1485-R	CCGGCCGTTTAATTTACTAGTGTG
	M1-F	GCGTCGACAGACATGACAAG
	M1-R	ATCGCCTTTTGCATTGGTT
	M2-F	ATGCATGCAGATGGGTGAT
	M2-R	CCCCAAATATTCCCTGACG
	M3-F	GGCTTGGTCTACCAATGGTCT
	M3-R	CAACGTCACACCCAAACATT
	M4-F	AATACCCGGAGTGAGAACGA
	M4-R	GGCTACAGGCTAGCGATGAC
	M5-F	GTGAGAGCAAGTTGGGTCGT
	M5-R	GCAAACACTTGGGAGGAGAG
	M6-F	AATGCTTGGGGTGTCTGTTC
	M6-R	GCGCACTTTTAGAGGAGGAG
	umc1635-F	GCTGAGCAGATCTTTCCTTGTTTC
	umc1635-R	AAGGAGCAGAACTCGGAGACG
	umc1709-F	AGCACACATGCACAACATCTTACA
	umc1709-R	CGTTGGGCCATGACTTTCTTTA
Detection of breakpoints	L1-F	CCTCAGGGTGTCGTAGAAGC
	L1-R	ACAGCACCTGGCCTATGAGT
	L2-F	CCAGCTGCTAGGCTTACGTC
	L2-R	CAGGTCCTCTCCACGTGTCT
	L3-F	CCGGTGATGAGTACCACCTT
	L3-R	TGACTGGTTGGGGAAGGATA
	L4-F	ACCCAAATACACCCACCAAA
	L4-R	GGGCATCGTACACGCTAAAT
	L5-F	GCAGGATAGCGGATAATGGA
	L5-R	GGGGGTTACCAGCTGAGATT
	L6-F	CCCACCATCAAAATCACCTT
	L6-R	CAGACGATCCTTGCATTGAA
	L7-F	AACCACCCCACATTCATAGC
	L7-R	GCATAGAACGGGAAACGAAC
	L8-F	GGGCGTTAGTCTCGTACTCG
	L8-R	TTCCCCTTTGTATGCCTGTC
	L9-F	CTCTCAAGCGGTCCAAAGAC
	L9-R	TGGGCCACTTTGTCTTTTTC
	L10-F	GGTCCAAAGACCCACTTGAA
	L10-R	GGAGATTGGGAGAGGTGTGA
	L11-F	GGAGTAAGGGAGGGATGAGC
	L11-R	TGGGCCACTTTGTCTTTTTC
	L12-F	CACACCATTCATTCGGTCAG
	L12-R	AACATTTCGGCCGATGTAAG
	L13-F	ACCTGAGGACGAACAAAACG
	L13-R	AACATTTCGGCCGATGTAAG
	L14-F	CCTGCCGGAATACAAAAGAA
	L14-R	GGTGAACCCATCTGCAATCT
	L15-F	CCTGCCGGAATACAAAAGAA
	L15-R	CGAGCTTAAGGACGACCATC
	L16-F	ATCATCCAGCCAAGTGAAGG
	L16-R	AGGAGAACACCGTCATCCAG
	L17-F	GCAAAACTCGAGAAGCCATC
	L17-R	GGATTCCCCATTGACAGCTA
	R1-F	CGAACCGGTATGCGTAGATT
	R1-R	CTCTATCGCCCGTGACCTTA
	R2-F	AACCTGATGTGCTTGGCATA
	R2-R	TGCCATTTCGATTCAGTGTC
	R3-F	ATAGGCACAGGAGCAAATGG
	R3-R	CTCTCTCTCGTGCCCAAATC
	R4-F	CCCCAGGGTTGTTAGGATTT
	R4-R	AAGGGGTATGGGAAAACCAC
	R5-F	CGTGACAAATGGGTAACACG
	R5-R	GGTCATGGACGAAGTCCCTA
	R6-F	TGAGCATGAGCTCGAAAATG
	R6-R	CGGTCCGGAGTCTTGTATTC
	R7-F	CGTACAACTCCGAACCAACC
	R7-R	ACTTAATCGCACCCATCAGG
	R8-F	GAAGCGCCATAATCACCCTA
	R8-R	CTTAGACCCCACAAGGACCA
	R9-F	TCAGGTTTCGCCTATTCACC
	R9-R	TGGCGGGAAATTTTACTTTG
	R10-F	GCTTGTCAGCGTTTCTTTCA
	R10-R	TCACATGCATTTTACGTGTCTC
	R11-F	GTTACCGACGCTATCCGTGT
	R11-R	TAGCCTTCGGAAATCTGTGC
	R12-F	TGGCGTTGTCACTTTCTCTG
	R12-R	GGAAATGCCAAAGGAATCAA
	R13-F	TGTGTAAGGGGAACCGTAGC
	R13-R	TAGCCCCTCGCAGTGTTAGT
	R14-F	AGCCCGAGTAAGCAGTTTCA
	R14-R	CTGGTTGCCACATATGGATG
	R15-F	ACAATTGATGCGTGAGCAAG
	R15-R	GGTTCACCTTCTGCTGCTTC
	R16-F	TTCACCGACATCTTCACCAA
	R16-R	CCCCTTGTACATCCATCACC
	R17-F	GGAAGGGAAAAACAGGGTGT
	R17-R	CTGCTGGTCTCCTCCTATGC
Real-time PCR	ZM003941-F	ACGGGCTAAGCAAGGAAGAC
	ZM003941-R	AACCAGATCCTGCCAACCAG
	ZM003948-F	GTTGGCCAATCGAGTCCAGA
	ZM003948-R	AGATTCTGGGCCTTGAGTGC
	ZM003949-F	TGGTCCATCATTGGTTGCCA
	ZM003949-R	GCCGACAAGATATGAGGCGA
	ZM003950-F	CGTGTTGGAGGTGGCTACTT
	ZM003950-R	ACGATCTGAGCAACTGCCAA
	ZM003954-F	GATGGCTCTGGCTCATCGTC
	ZM003954-R	GGGAAGTTCTGGACGCATGT
	ZM003957-F	GGGACTCCATCTCTGCTGTG
	ZM003957-R	CTCTCAATCTCCGCCTGGTC
	ZM003958-F	GGGTGCTGTCCATGGTAGAC
	ZM003958-R	CCAATTCTGCAGTTGCCTGG
	ZM003961-F	GTGCTCTTCGTGCTCCTCTC
	ZM003961-R	AGATGATGGTGTGGACGGTG
	ZM003962-F	TGCTGTTCGTGGTCCTCAC
	ZM003962-R	GGTGATGAGCGCGAAGTAGA
	ZM003966-F	CATGGAGGTTGCTGGAAACG
	ZM003966-R	GCTCCTGCACCCTGGATATG
	ZM003967-F	GTGCCCGCATTCGACAAAAA
	ZM003967-R	GACGGTATTGGGGATCGTGG
	ZM003974-F	TGAGCCCTGCTGAACTTGAG
	ZM003974-R	TGAAAAGATGGCAGGACGCT
	ZM003975-F	GGGTGGTACTGTGACTGACG
	ZM003975-R	TCACCTCCAGTGCCAATTGC
	ZM003984-F	GTGTCTACAGTCCTGCACCC
	ZM003984-R	TCACTTGATGGAGCAGTGCC
	ZM003986-F	TTGGTTGGAGCCTCAGGAAC
	ZM003986-R	GTTGGTCGCTTTGCTGTGAG
	ZM003993-F	GTGGGCAGAGACATGTTCGA
	ZM003993-R	CGAGCTCCCTGAACCTCTTG
	ZM004004-F	GGTCTGCGTTCATCCATCCA
	ZM004004-R	AGCTTGGAAGTTAGGAGCACC
	ZM004006-F	TCGCCTGTCTCCAGTCTAGT
	ZM004006-R	AAAAAGCTCCCACCAACCGA
	ZM004008-F	TGGCCCTTCAAATGAGTTCCA
	ZM004008-R	CAGCAGCCTCTGACTTGACA
	ZM004009-F	CGAACCAAGAAGGCCGGAAT
	ZM004009-R	TGACCTACCTTCCCACAGAAC
	qActin-F	CCAAGGCCAACAGAGAGAAA
	qActin-R	CCAAACGGAGAATAGCATGAG
Verification of deletion segement	ZMG1-F	GTCAGGTACCCGCTCTTCAA
	ZMG1-R	TTGTCCAATGCATGTTTCGT
	ZMG2-F	CTGTCCCAACAAACATGTCG
	ZMG2-R	TGATGTCCATCGTGTCCACT
	ZMG3-F	GTCCCAGTGGAGGCAGAA
	ZMG3-R	TCTGGTGCGATTTGGTAGTG
	ZMG4-F	ATCTCCCTCCTTTTCCTCCA
	ZMG4-R	AACTCATCCACCCACCCATA
	ZMG5-F	GTGAAGGACGGCTCATCAAT
	ZMG5-R	GTTGCTGGGAAGACAAGAGC
	ZMG6-F	TCTCCCAACCCTGAAGTCAC
	ZMG6-R	AAGCCAAGGCAACTGTCTGT
	ZMG7-F	AAATCAGCCTTCACCAATGC
	ZMG7-R	TGCTCCTCGCCTCATATCTT
	ZMG8-F	TTTTGTCGTGAACTGCTTGC
	ZMG8-R	GCCTAACTAGCGCCATTCTG
	ZMG8-1-F	AAATCAGCCTTCACCAATGC
	ZMG8-1-R	AGACCATGCTGCGCTTATCT
	ZMG8-2-F	CATCCATGCAGAATTGGAGA
	ZMG8-2-R	TAGCATTGGCAGTTGCTCAG
	ZMG9-F	TCGAGCCTCCTCAAGTTGTT
	ZMG9-R	TGGCATTCTCTGCCCTATTC
	ZMG10-F	AGACAAGGAGGACGAGCAGA
	ZMG10-R	AACGGAGCAAGGCAAAGATA
	ZMG11-F	CGCATTCTTCTGTGACGAAA
	ZMG11-R	GCACATGCCTTGACTTGAAA
	ZMG12-F	TCAGCAGTTGCTCCACAATC
	ZMG12-R	TGTGTTGGGCTGTGATGTTT
	ZMG13-F	GCCGGTGTAGATGTGGAGTT
	ZMG13-R	CCTGCTCGCTTTCTCACTCT
	ZMG14-F	GGAGGGGAATCAGAGAGGTC
	ZMG14-R	CCGCAAGCAAGATTACACAA
	ZMG15-F	TGCATATATGGAAGCCGTCA
	ZMG15-R	ATGGTTAGTTTGGCGTCCAC
	ZMG16-F	CCGCCAGTACTCCAAATCTC
	ZMG16-R	CCCTCATCTCCGTCTCTACG
	ZMG17-F	GGCTACCTCACACAGTGCAG
	ZMG17-R	GCGCATGGTGGTCAGTAGTA
	ZMG18-F	ATGGGGTCTGCTGAGATTTG
	ZMG18-R	ATGGAAACTGGTTGCAGGAC
	ZMG19-F	CGACAGAAATCTGTTGCTTCC
	ZMG19-R	AGCACACCTTGAAGCCAAAC
	ZMG20-F	CCCAAGAAGACCACCTGTGT
	ZMG20-R	TTCATCTGCAGTGCCTTGTC
	ZMG20-1-F	CCCAAGAAGACCACCTGTGT
	ZMG20-1-R	CAAGGCCTGATTGATGGACT
	ZMG20-2-F	TTAAGCTCCTCGGCTGTGTT
	ZMG20-2-R	GATTCATCGAAGGCAGAACC
	ZMG21-F	CGATGGTAATGGCGGAGTAT
	ZMG21-R	CCTTTCCACGCTGAACAAAT
	ZMG22-F	CAAAGCGAGCTGTGAGTGAG
	ZMG22-R	AATATCCCCAAGGCATTTCC
	ZMG23-F	ATCAAGGGAGGAAGCTGTCA
	ZMG23-R	GCCTGAAACCAATTTCCTCA
	ZMG24-F	CTTGTGGCTTCTGTGGGATT
	ZMG24-R	TGCTGATGCAATGAGAGTCC
	ZMG25-F	CTGGACCTCGATCTGACCAT
	ZMG25-R	AGCTAGCTAGGGGTGGAAGC
	ZMG26-F	CGAGATGGAGGGGTAGTTCA
	ZMG26-R	ATCTTGAAACCCGACGTCAC
	ZMG27-F	AGGAGAGGCGAAGTGAGACA
	ZMG27-R	GTCCCGGTCTGTCGGTATG
	ZMG28-F	GAGTTAGCGCAGCTCATCG
	ZMG28-R	CATGCCAGACCACACTGAAG
	ZMG28-1-F	CCACTAGGTGGTGTGACTGC
	ZMG28-1-R	CCTCCGAAGACCTACTGTCG
	ZMG28-2-F	CCACCCCTACCCTATTGAGG
	ZMG28-2-R	TTGCCAAGCTCAAACACAAG
	ZMG29-F	AAGGATTTTCCCTCCCTGAA
	ZMG29-R	CTGCACACTCCTGCTTCAAA
	ZMG30-F	TTGCTCTGTCCAGTGTTTCG
	ZMG30-R	AGTATGCTTGCCCCAACAAG
	ZMG31-F	TCCAACACAGCAACGCTATC
	ZMG31-R	GTTTTGGTCCATGGCAAGTT
	ZMG32-F	ACCACGGAGCACTGCTATTT
	ZMG32-R	AACATCCACGCCACTAGACC
	ZMG33-F	GATCGACGACCGATTCATTT
	ZMG33-R	ACCACAATCTTCCACCTTGC
	ZMG34-F	CTCTCCCCCATTGTCTTGAA
	ZMG34-R	CCCAAGATTGCAACCAGATT
	ZMG35-F	TGCCTCCTGAGCGACTTC
	ZMG35-R	GCGAGAAACGGACAGAAAAA
	ZMG36-F	GACAAGATGCTGCTGGAACA
	ZMG36-R	GCTAAAAACCGTTTGGTGGA
	ZMG37-F	CCGCCTGAGTTGTTTCCTAA
	ZMG37-R	TGACAATCCCCAAGAAAAGG
	ZMG38-F	GCTCTAAACGCCACGAGTTC
	ZMG38-R	AAGGCACAAGAAGAGCTCCA
	ZMG39-F	CACGCTACAGCCGCTACATA
	ZMG39-R	CGAGTGGGTGAGGTAGTCGT
	ZMG40-F	GATCCATCACCTCCCCTACTC
	ZMG40-R	CAACCATGCGTTCTCAACAG
	ZMG41-F	ACAATGATGGCGTATTCCAAA
	ZMG41-R	GGCCCTACAAATAGTGGGAAA
	ZMG41-1-F	CAATGATGGCGTATTCCAAA
	ZMG41-1-R	TGGACAACATGCATCCTCAT
	ZMG41-2-F	CCCCTTGATTTACAGCCAAC
	ZMG41-2-R	CGAAAGCCCAAGAAAAGAAG
	ZMG42-F	TTCTTGCGAGGAAGGTTGTT
	ZMG42-R	GCACGAGTGTTGTCAGGAAA
	ZMG43-F	CCCTGGATAATACGGAACGA
	ZMG43-R	CAAGCCTGGGAGATCCATTA
	ZMG44-F	TCGAGGTTGGGTTCTTTCAC
	ZMG44-R	GTTCCCCAGTTCTCAAACCA
	ZMG45-F	AGCGTTGACATTGACACGAC
	ZMG45-R	GTTTACATGCATTCGGCTCA
	ZMG46-F	TGGTTCAAATGGGTGTCCTT
	ZMG46-R	CACACAGCATTACCGATTGC
	ZMG47-F	TGTGGGAAGGTAGGTCATCC
	ZMG47-R	ACCCCAGTATGCCTGACAAG
	ZMG48-F	CTGATAGGCCAAGGGTTGAG
	ZMG48-R	TCAAAACATGAAACGGGTGA
	ZMG48-1-F	AGATGTCCTGGACCCCTTCT
	ZMG48-1-R	TCAAAACATGAAACGGGTGA
	ZMG48-2-F	CTGATAGGCCAAGGGTTGAG
	ZMG48-2-R	TTGCTTGATCCGAAATAGGG
Amplification of segments near breakpoints	LB-F	AGTTTGGGCTTTGGTACCCT
	LB-R	GGTGAATAGGGCGAAACTGA
	RB-F	TGGTCTTTCGGCATTAAGGA
	RB-R	TGCCATAGTGGGTAATTCTGC
